# Supplementary material for: Building Minimized Epigenetic Clock by iPlex MassARRAY Platform
Source: MDPI journal article supplement (doi:10.3390/genes15040425), 2024-03-28
Supplement: s1 [file s1]

GSE87571

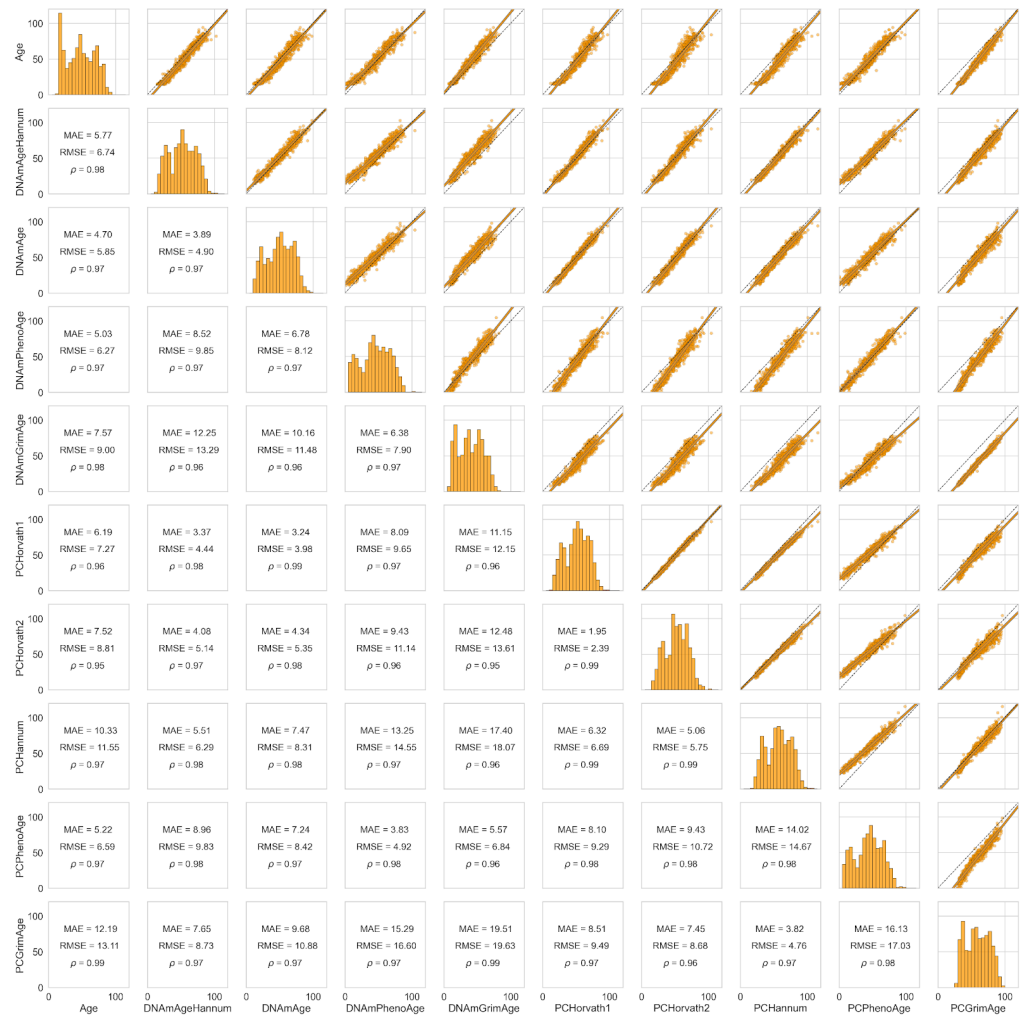

# GSE40279

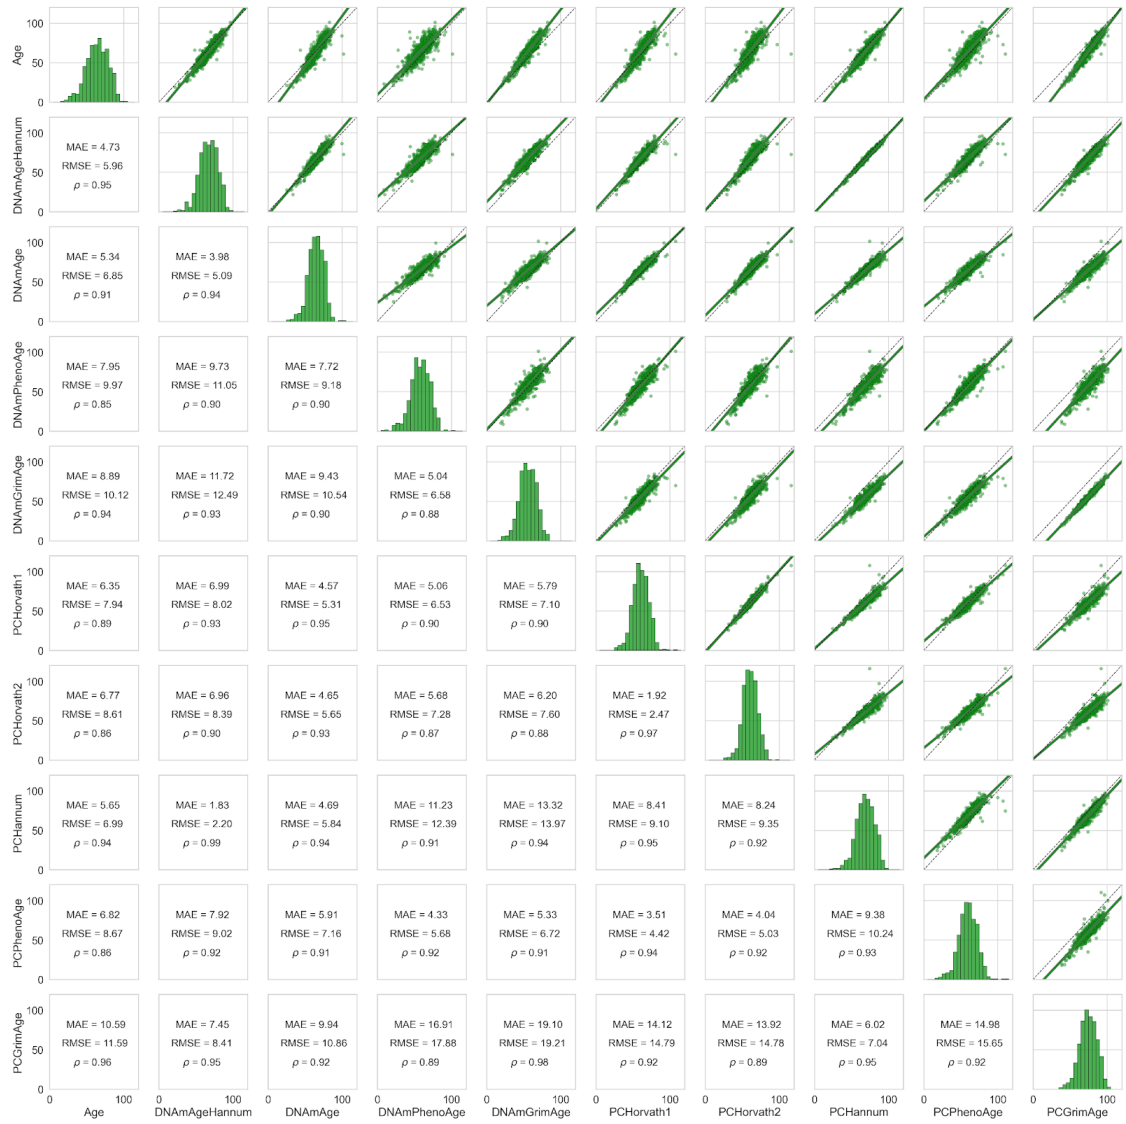

# GSE55763

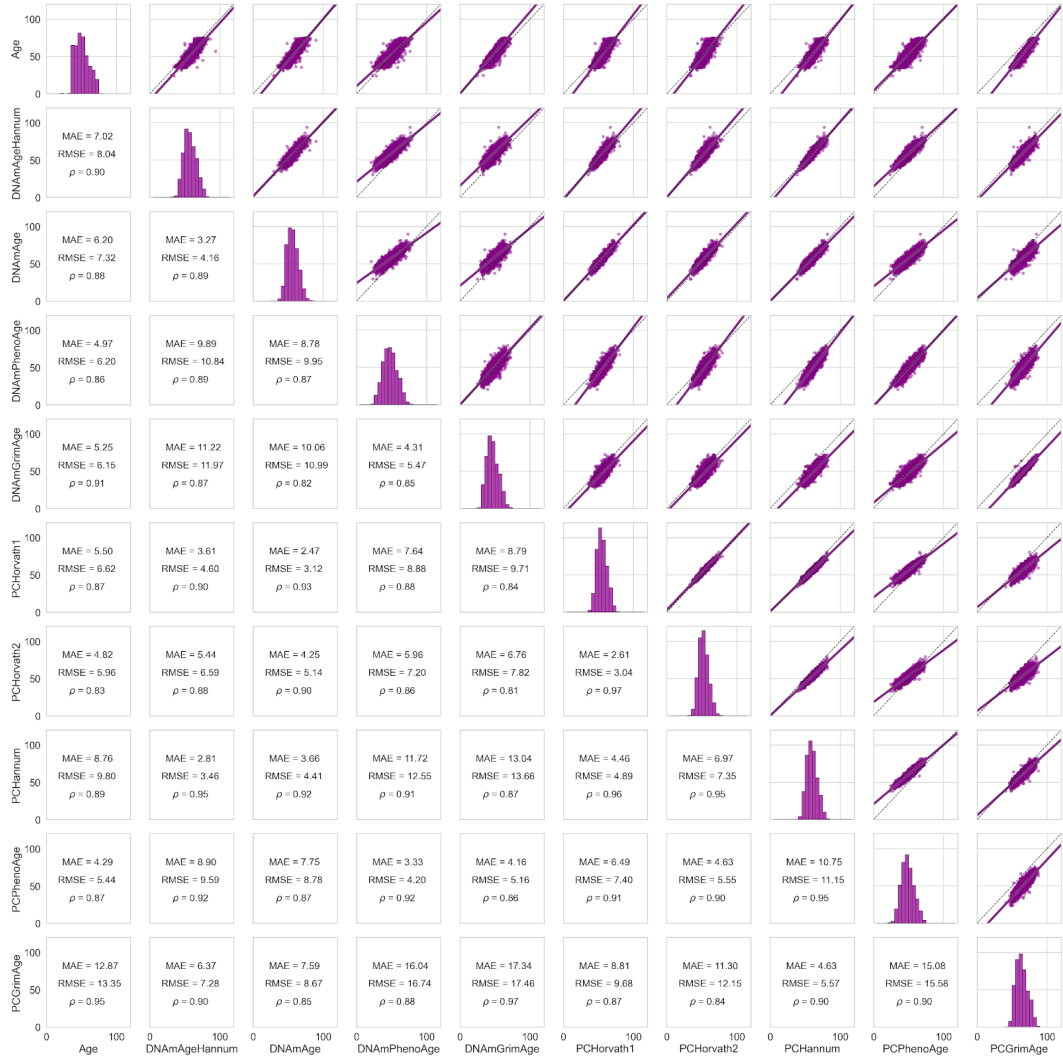

# GSE152026

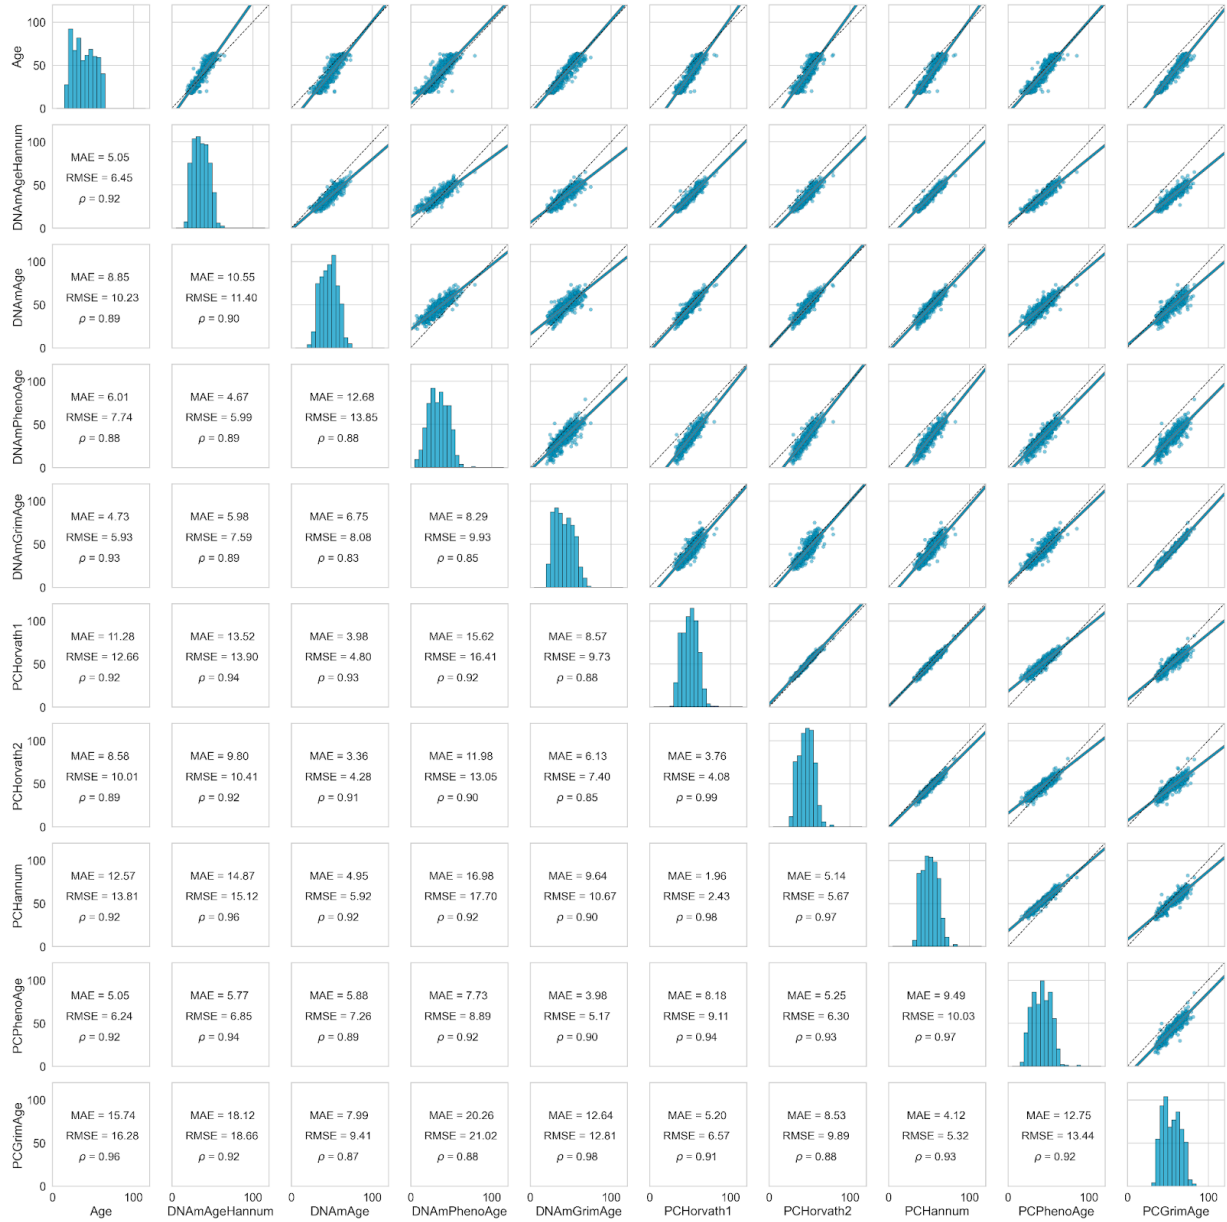

**Figure S1.** Work efficiency of different epigenetic clocks on considered datasets (GSE87571, GSE40279, GSE55763, and GSE152026). The left side of these figures indicates four types of epigenetic clock from Horvath's calculator—DNAmAgeHannum, DNAmAge, DNAmPhenoAge, and DNAmGrimAge—and its five PC variations. The first column shows error values relative to chronological age (MAE), root-mean-squared error (RMSE), and correlation between different epigenetic clock models.

Table S1. MassArray design details.

| Extension Primers (5'-3') | Tm, °C | Amplicon Length (bp) | Forward and Reverse Primers (5'-3')       | CpG_ID     |
|---------------------------|--------|----------------------|-------------------------------------------|------------|
| TGG GGT GTT TAA GGT       | 58.7   | 189                  | ACG TTG GAT GGT TGT AGT TTG GAG TTT AG    | cg07547549 |
| GTT GGA ATG               | 63     |                      | ACG TTG GAT GAT CTT CTA TCC CCT TCC CAC   |            |
| GTG GTT TTT GTT TTT       | 61.6   | 131                  | ACG TTG GAT GGG TAT TGA GTG AGG TAT AGG   | cg08262002 |
| TTA GAA                   | 60.4   |                      | ACG TTG GAT GCC ATT CAC CAT TCA TAC ATT C |            |
| GAT GAA GAG AGG AAT       | 63     | 136                  | ACG TTG GAT GGT TAG GGG TTT GTA GTG TGG   | cg01620164 |
| TAT AAG ATT               | 60.3   |                      | ACG TTG GAT GTC ACC AAA ATC CAA CCA AAC   |            |
| GTT AGG TTT GTA GTG       | 60.3   | 118                  | ACG TTG GAT GGT TTA GTA ATG AGA TGA GGG   | cg11649376 |
| GA                        | 60.3   |                      | ACG TTG GAT GAC TCT AAC CAA TTC CAT TCC   |            |
| CCC CCG TGT ATA TGT       | 61.6   | 124                  | ACG TTG GAT GTG AGT GTG GAG GAA TGA ATG   | cg16008966 |
| GTG TAT GTG               | 60.4   |                      | ACG TTG GAT GCT TTC ATT CTT ACT CTA CCT C |            |
| GTT TTG GGA GTA TAG       | 56.2   | 153                  | ACG TTG GAT GGT TTG TTA GGG TTT TTT TTT   | cg06639320 |
| TAG TTA T                 | 61.5   |                      | ACG TTG GAT GTA AAC AAA CCC CTA CCA CC    |            |
| GTA GTA GTT TTA GIG       | 56.2   | 158                  | ACG TTG GAT GTA TTA GGT TTT ATA TGA AGG   | cg14556683 |
| ATA GG                    | 61.7   |                      | ACG TTG GAT GCT ACT ACA AAT ACC CCT AAC C |            |
| TTT CGG IGT GGG TTT T     | 56.2   | 153                  | ACG TTG GAT GGT TTG TTA GGG TTT TTT TTT   | cg22454769 |
|                           | 61.5   |                      | ACG TTG GAT GTA AAC AAA CCC CTA CCA CC    |            |

Table S2. Description of datasets.

| Number of Probes<br>After Preprocessing | Number of<br>Subjects | Methylation Data Details                                                                                        | Dataset   | Illumina |
|-----------------------------------------|-----------------------|-----------------------------------------------------------------------------------------------------------------|-----------|----------|
| 411,974                                 | 729                   | Raw .idat files, functional normalization                                                                       | GSE87571  |          |
| 412,039                                 | 656                   | No raw .idat files, no normalization, adjusting for internal controls by the Illumina's Genome Studio software. | GSE40279  | 450K     |
| 412,340                                 | 2639                  | No raw .idat files, quantile normalization                                                                      | GSE55763  |          |
| 739,168                                 | 131                   | Raw .idat files, functional normalization                                                                       | UNN       | EPIC     |
| 743,182                                 | 519 (Controls)        | No raw .idat files, normalization: dasen from wateRmelon                                                        | GSE152026 |          |

Table S3. Localization of the studied CpGs.

| Relation_to_UCSC_CpG_Island | UCSC_RefGene_Group               | UCSC_RefGene_Accession                                 | UCSC_RefGene_Name         | Position       | CpG_ID     |
|-----------------------------|----------------------------------|--------------------------------------------------------|---------------------------|----------------|------------|
| Island                      | Body (intron); Body (intron)     | NM_020708;<br>NM_001134771                             | SLC12A5;<br>SLC12A5       | chr20:44658226 | cg07547549 |
| Open_sea                    | Body (intron); Body (intron)     | NM_001290;<br>NM_001130834                             | LDB2; LDB2                | chr4:16575323  | cg08262002 |
| N_Shelf                     | Body (intron)                    | NM_018086                                              | FIGN                      | chr2:164590273 | cg01620164 |
| S_Shore                     | Body (intron)                    | NM_024560                                              | ACSS3                     | chr12:81473234 | cg11649376 |
| Open_sea                    | -                                | -                                                      | -                         | chr1:114761794 | cg16008966 |
| Island                      | TSS200; TSS200;<br>5'UTR; TSS200 | NM_001039492;<br>NM_001450;<br>NM_201557;<br>NM_201555 | FHL2; FHL2;<br>FHL2; FHL2 | chr2:106015740 | cg06639320 |
| Island                      | 1stExon; Body (exon)             | NM_024794;<br>NM_001142886                             | EPHX3; EPHX3              | chr19:15342983 | cg14556683 |
| Island                      | TSS200; TSS200;<br>5'UTR; TSS200 | NM_001039492;<br>NM_001450;<br>NM_201557;<br>NM_201555 | FHL2; FHL2;<br>FHL2; FHL2 | chr2:106015768 | cg22454769 |

Table S4. Methylation level (%) of studied CpGs in UNN MassARRAY dataset.

| cg22454769 | cg14556683 | cg06639320 | cg16008966 | cg11649376 | cg01620164 | cg08262002 | cg07547549 | Age   | Sex | Sample |
|------------|------------|------------|------------|------------|------------|------------|------------|-------|-----|--------|
| 24.69      | 9.12       | 30.15      | 57.88      | 53.36      | 23.08      | 44.22      | 31.19      | 24.72 | m   | I21    |
| 35.36      | 5.49       | 28.72      | 70.40      | 61.32      | 25.49      | 59.74      | 40.77      | 24.73 | m   | I42    |
| 47.57      | 5.52       | 45.43      | 55.34      | 62.27      | 24.01      | 52.15      | 28.98      | 24.99 | f   | I31    |

|       |       |       |       |       |       |       |       |       |   |      |
|-------|-------|-------|-------|-------|-------|-------|-------|-------|---|------|
| 33.17 | 2.09  | 33.69 | 64.54 | 55.21 | 25.83 | 51.43 | 28.36 | 25.35 | f | I55  |
| 45.76 | 6.35  | 41.98 | 60.86 | 64.00 | 25.13 | 62.45 | 35.31 | 26.01 | m | I33  |
| 39.41 | 4.17  | 35.96 | 53.42 | 43.30 | 24.73 | 46.66 | 41.32 | 29.25 | m | I11  |
| 39.78 | 8.88  | 34.87 | 58.43 | 59.47 | 25.68 | 57.98 | 26.45 | 30.9  | f | I28  |
| 35.66 | 1.97  | 38.82 | 58.67 | 54.24 | 22.98 | 46.76 | 57.30 | 32.24 | m | I34  |
| 36.80 | 0     | 39.47 | 55.77 | 51.03 | 28.90 | 41.22 | 33.69 | 32.78 | f | I2   |
| 32.38 | 10.57 | 41.99 | 56.85 | 51.61 | 23.37 | 47.02 | 47.49 | 32.85 | m | I14  |
| 42.29 | 1.11  | 16.23 | 64.42 | 64.10 | 39.85 | 72.12 | 19.93 | 33.99 | f | I27  |
| 44.86 | 5.32  | 31.95 | 67.61 | 59.84 | 47.70 | 63.68 | 30.77 | 36.84 | f | I19  |
| 26.74 | 0     | 40.29 | 56.72 | 54.81 | 22.74 | 44.31 | 48.97 | 38.54 | f | I45  |
| 40.57 | 3.80  | 25.05 | 65.29 | 68.96 | 15.88 | 81.16 | 24.06 | 38.87 | m | I1   |
| 41.05 | 2.01  | 41.09 | 61.64 | 50.76 | 24.01 | 46.74 | 49.51 | 41.54 | f | I29  |
| 39.69 | 1.31  | 48.02 | 61.66 | 60.12 | 24.94 | 48.89 | 42.82 | 41.79 | m | I4   |
| 41.33 | 1.34  | 39.20 | 60.03 | 59.19 | 47.29 | 59.65 | 23.64 | 42.07 | m | I7   |
| 50.70 | 10.44 | 30.29 | 57.05 | 56.84 | 6.16  | 65.32 | 25.31 | 42.45 | m | I32  |
| 42.04 | 5.88  | 39.87 | 63.96 | 54.78 | 25.79 | 49.68 | 30.08 | 42.89 | m | I62  |
| 52.66 | 1.31  | 50.94 | 61.94 | 57.65 | 26.53 | 54.80 | 35.43 | 47.6  | f | I20  |
| 42.20 | 6.86  | 48.37 | 55.83 | 55.74 | 25.30 | 44.96 | 36.42 | 48.3  | f | I48  |
| 39.92 | 3.12  | 32.20 | 61.30 | 52.08 | 25.85 | 57.58 | 9.13  | 49.74 | m | I47  |
| 49.83 | 0     | 41.63 | 69.47 | 56.82 | 25.95 | 80.11 | 32.12 | 50.18 | f | I63  |
| 47.80 | 0     | 39.67 | 62.92 | 50.56 | 20.87 | 45.34 | 42.09 | 50.26 | f | I54  |
| 37.46 | 4.96  | 64.28 | 59.23 | 54.69 | 31.97 | 45.02 | 57.14 | 53.53 | f | I5   |
| 57.52 | 0     | 17.35 | 14.68 | 49.23 | 11.87 | 72.70 | 40.44 | 53.83 | m | I6   |
| 30.12 | 2.59  | 54.96 | 58.03 | 52.09 | 27.02 | 55.08 | 45.98 | 55.49 | m | I38  |
| 56.36 | 6.50  | 56.10 | 51.57 | 43.99 | 18.90 | 37.16 | 30.28 | 55.52 | f | I16  |
| 34.54 | 30.54 | 55.11 | 55.73 | 61.79 | 34.86 | 34.44 | 53.12 | 55.58 | f | I39  |
| 46.51 | 6.06  | 49.53 | 64.71 | 54.10 | 26.90 | 51.90 | 44.83 | 55.68 | f | I44  |
| 49.97 | 7.75  | 47.98 | 55.79 | 49.17 | 25.41 | 43.25 | 59.70 | 58.9  | m | I17  |
| 52.78 | 15.41 | 31.51 | 63.24 | 50.70 | 26.69 | 59.41 | 21.02 | 60.51 | f | I61  |
| 51.49 | 8.64  | 48.65 | 53.75 | 52.56 | 24.21 | 51.50 | 47.18 | 61.64 | f | I53  |
| 50.91 | 10.46 | 31.99 | 68.50 | 55.27 | 35.95 | 71.39 | 30.10 | 64.03 | f | I56  |
| 55.08 | 0     | 49.47 | 69.11 | 59.54 | 33.99 | 62.83 | 33.01 | 64.49 | f | I51  |
| 53.76 | 6.02  | 53.98 | 56.10 | 53.50 | 26.60 | 53.02 | 37.13 | 66.85 | m | I69  |
| 51.69 | 10.62 | 57.70 | 62.89 | 59.54 | 26.74 | 52.18 | 39.07 | 67.12 | f | I52  |
| 57.81 | 0     | 51.81 | 86.97 | 52.29 | 13.65 | 67.67 | 38.19 | 68.09 | m | I67  |
| 47.80 | 4.96  | 51.39 | 58.22 | 48.04 | 26.16 | 46.38 | 35.80 | 69.52 | f | I73  |
| 55.55 | 6.51  | 43.15 | 51.66 | 47.37 | 31.44 | 60.02 | 27.25 | 69.99 | f | I59  |
| 41.42 | 0.49  | 36.04 | 34.32 | 35.20 | 23.98 | 35.28 | 43.04 | 70.68 | m | I25  |
| 39.13 | 7.78  | 41.02 | 55.81 | 53.45 | 45.46 | 50.66 | 31.54 | 72.26 | f | I71  |
| 57.95 | 3.13  | 67.38 | 60.24 | 53.28 | 24.48 | 44.56 | 40.98 | 74.35 | f | I100 |
| 59.45 | 5.02  | 55.20 | 41.77 | 54.21 | 24.21 | 40.05 | 61.24 | 77.11 | m | I76  |
| 42.41 | 0     | 41.32 | 35.14 | 32.67 | 22.21 | 36.59 | 29.01 | 78.08 | f | I43  |
| 71.60 | 10.16 | 69.08 | 41.83 | 56.75 | 17.05 | 43.54 | 40.66 | 79.71 | m | I94  |
| 47.39 | 11.27 | 58.30 | 46.95 | 46.61 | 27.72 | 35.18 | 32.38 | 82.15 | f | I96  |
| 49.57 | 10.79 | 57.13 | 57.25 | 53.13 | 24.46 | 43.96 | 42.13 | 82.87 | m | I92  |
| 54.91 | 31.05 | 62.44 | 50.13 | 46.45 | 38.56 | 30.80 | 42.64 | 83.53 | f | I93  |
| 48.05 | 12.55 | 60.07 | 47.03 | 47.43 | 29.48 | 32.69 | 40.31 | 83.64 | f | I95  |
